# Supplementary material for: Ecological Stability Properties of Microbial Communities Assessed by Flow Cytometry
Source: PubMed Central journal article supplement (PMC5770544; doi:10.1128/msphere.00564-17), 2018-01-17
Supplement: sph001182449s2.pdf [file sph001182449s2.pdf]

# Ecological stability properties of microbial communities assessed by flow cytometry

Zishu Liu<sup>1</sup>, Nicolas Cichocki<sup>1</sup>, Fabian Bonk, Susanne Günther, Florian Schattenberg, Hauke Harms, Florian Centler, Susann Müller

UFZ – Helmholtz Centre for Environmental Research, Department of Environmental Microbiology, Permoserstr. 15, 04318 Leipzig, Germany.

<sup>1</sup>divided first authorship

## Supplemental Text S2

### S2: Flow cytometric analysis

#### S2.1: Harvesting, fixation, and staining procedure for flow cytometry

##### *Harvesting:*

Samples were harvested from the bioreactor via a specific silicone membrane port under sterile conditions by using sterile needles and syringes. At each sampling time two samples of 2.2 mL were taken for the biological replication procedure. This harvesting procedure was done every 30 min, during the first 6 h after each disturbance (pH, temperature) and every 2 h otherwise (excluding nights and weekends).

##### *Fixation:*

Samples were centrifuged (3 200 g, 10 min, 4 °C) and the supernatant was discarded. The cells were washed in phosphate buffered saline (PBS: 6 mM Na<sub>2</sub>HPO<sub>4</sub>, 1.8 mM NaH<sub>2</sub>PO<sub>4</sub>, 145 mM NaCl, pH 7) once (3 200 g, 10 min, 4 °C) and stabilized by adding a para-formaldehyde solution (PFA, 2 % in PBS) to the cell pellet and incubated for 30 min at room temperature (RT). After another centrifugation step (3 200 g, 10 min, 4 °C), 2 mL of ethanol (70 %) were added for fixation and the cell solution stored at -20 °C for two months maximum.

### *Staining:*

For the staining procedure, the cells were taken out of the fixation solution (70 % ethanol), centrifuged, washed in PBS, centrifuged again, and the optical density (OD) of the cells adjusted to 0.035 ( $d_{\lambda 700\text{nm}} = 0.5$  cm) in 2 mL PBS (6 mM  $\text{Na}_2\text{HPO}_4$ , 1.8 mM  $\text{NaH}_2\text{PO}_4$ , 145 mM NaCl, pH 7). Then, the samples were washed another time (3 200 g, 10 min, 4 °C in PBS) and 1 mL of solution A (citric acid 0.11 M, Tween 20, 4.1 mM, in bidistilled water) was added. Incubation took place for 20 min at RT; 10 min in a ultrasonication water bath for CMC samples (ultrasonic bath, Merck Eurolab, Darmstadt, Germany, at RT), and 10 min on the lab bench for AMC samples. After another centrifugation step (3 200 g, 10 min, 4°C) the cells were stained with 0.24  $\mu\text{M}$  DAPI (4',6-di-amidino-2-phenyl-indole, Sigma-Aldrich, St. Louis, USA) in 417 mM  $\text{Na}_2\text{HPO}_4/\text{NaH}_2\text{PO}_4$  buffer (289 mM  $\text{Na}_2\text{HPO}_4$ , 128 mM  $\text{NaH}_2\text{PO}_4$ , pH 7) overnight in the dark at RT. The stained samples were filtered using 50  $\mu\text{m}$  CellTrics filter (Sysmex Partec GmbH, Görlitz, Germany) before measurement to prevent clogging of the cytometer nozzle (70  $\mu\text{m}$ ).

The influence of the sonication procedure on the cytometric community structure was tested for one sample (Fig. S2.1). One untreated sample (A) was compared to one subjected to sonic treatment (B) and sonic treatment during incubation in solution A (C). As shown below the differences between the three approaches were only small, and we decided to use treatment C.

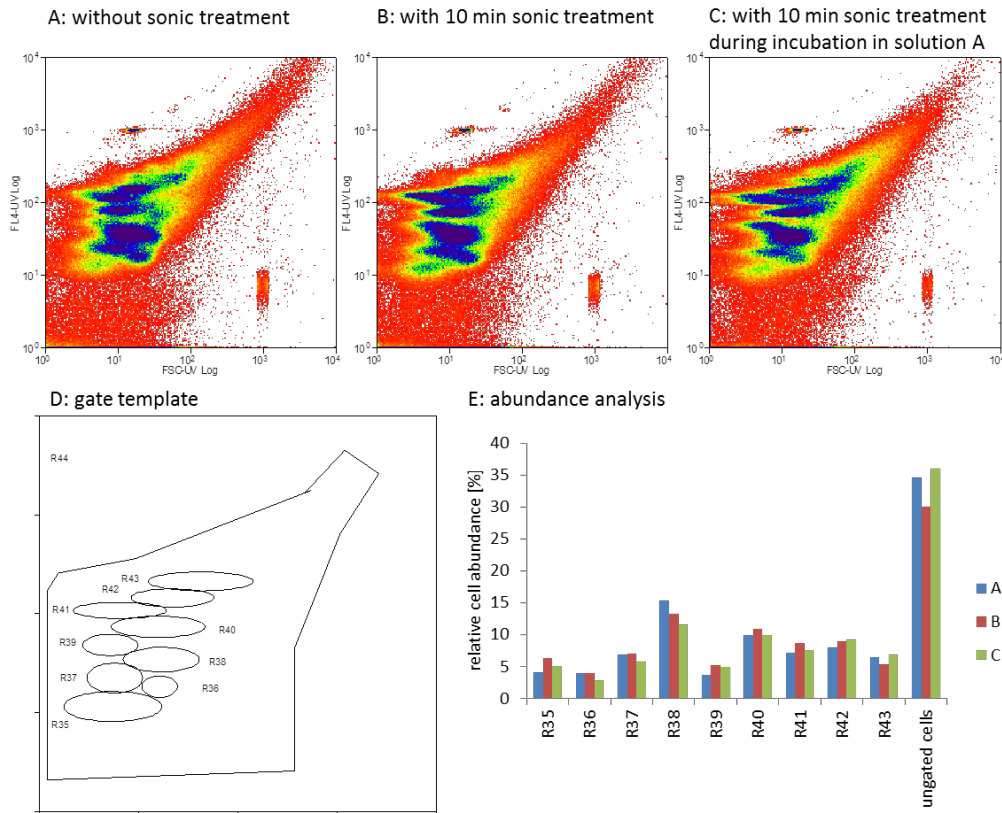

**Figure S2.1:** Testing of sonication on cytometric community patterns from a cultivated pre-test CMC: **(A)** untreated sample, **(B)** treatment with 10 min sonication before OD adjustment, **(C)** treatment with 10 min sonication during incubation in solution A. **(D)** gate template for abundance analysis, **(E)** relative abundance of cells in gates.

#### Cell Analysis:

Samples were measured with a MoFlo Legacy cell sorter (Beckman-Coulter, Brea, California, USA) which is equipped with two lasers. The 488nm laser Genesis MX488-500 STM OPS (Coherent, Santa Clara, California, USA) at 400 mW was used for measurement of FSC (bandpass filter 488/10, neutral density filter 1.9) and SSC signal (bandpass filter 488/10, neutral density filter 1.9, trigger signal) and the 355nm UV laser Xcyte CY-355-150 (Lumentum, Milpitas, California, USA) at 150 mW for UV-induced fluorescence (bandpass filter 450/65). Photomultiplier tubes were purchased from Hamamatsu Photonics (Models R928 and R3896; Hamamatsu City, Japan). Daily and in-between-day calibration of the instrument was performed with fluorescent 1  $\mu\text{m}$  UV beads (FluoSpheres (350/440)) and 2  $\mu\text{m}$  yellow-green beads (FluoSpheres (505/515), both from Molecular Probes (Eugene, Oregon, USA). UV beads (0.5  $\mu\text{m}$  and 1  $\mu\text{m}$ , both Fluoresbrite BB Carboxylate microspheres, (360/407), Polyscience, Niles, Illinois, USA) were added to each sample.

DNA-stained samples were measured flow cytometrically as logarithmically scaled 2D-dot plots according to DAPI fluorescence for DNA content and forward scatter for cell size related information. For every 2D-dot plot 250 000 cells were measured (see Section S2.4) and beads (0.5 µm and 1 µm UV beads, Fluoresbrite BB Carboxylate microspheres (360/407), PolyScience, Niles, USA) were amended into the sample for adjustment. Cell numbers of the cell suspensions were determined using a defined number of 1 µm yellow-green beads (YG beads, FluoSpheres (505/515), Molecular Probes, Eugene, USA) measured together with a defined volume of DNA-stained cells. The 2D-dot plots were gated with regard to cells and beads (gating strategy see Section S2.4), and cell counts were calculated as follows:

$$\text{Cell number mL}^{-1} = \frac{f \cdot C(\text{parent}) \cdot B \cdot V}{B(\text{YG}) \cdot V(\text{sample})}$$

*f*: The dilution rate of sample for counting

*C*(parent): The virtual cell number in the parent gate

*B*: The defined concentration of 1 µm YG beads

*V*: The volume of defined concentration 1 µm YG beads

*B*(YG): The number of beads in the gate 1 µm YG beads

*V*(sample): The defined volume of DNA- stained cells sample

#### *Cell Sorting:*

The cell sorting procedure was done as follows: 70 % ethanol fixed samples were washed in PBS and stained according to the procedure described above. After setting gates for sorting, the sort procedure was started. Each sorted sample was composed of 500 000 cells for every gate selected for sorting. The sorting procedure was done in the most accurate sort mode of the MoFlo (highest-purity sort mode single-cell and one-drop: purity 99 %) at a rate not higher than 2 500 particles per second. Cells were harvested by a centrifugation step (20 000 g, 4 °C, 25 min), and the pellet was frozen at -20 °C for later pooled DNA extraction, library preparation and MiSeq sequencing.

#### **S2.2: Cytometric terms used in the study**

Cytometric terms used in this study are collected in Box S2.1. Some of the terms were newly defined while others were described in an earlier work (Koch et al. 2014).

### Box S2.1: Cytometric terms

**FSC:** Forward scatter is an optical characteristic containing information related to cell size.

**SSC:** Side scatter is an optical characteristic containing information related to cell density.

**DAPI fluorescence:** Is an optical characteristic that is used for quantification of cellular DNA content.

**Event:** Can be a cell, a bead, or noise in a cytometric histogram.

**Beads:** Monodispersed microspheres are used for calibration of the instrument, the alignment of the 2D-dot plots, and for cell number determination.

**Cell:** The microbial cell is an individual biological unit. It is characterized by optical characteristics which can be measured using flow cytometry.

**Virtual cell:** The virtual cell represents the cell's characteristics regarding the chosen optical parameters usually in a 2D-dot plot.

**Community:** Is the entity of microorganisms in a natural sample. It can comprise high diversity, i.e., hundreds of different species regarding phylogeny and function.

**Subcommunity/Cluster:** Virtual cells with similar optical properties.

**Gate:** A gate marks a cluster of cells in the histogram that differ from others in their optical properties. It can be defined using one, two, or even more parameters.

**Gate-template:** Represents the entity of all gates. It is defined by marking all upcoming clusters of one defined experimental series and finally applied to all samples within this experiment.

**Cell sorting:** Separation of selected cells out of a community using a cell sorter. Cells were further processed by Illumina sequencing in this study.

### S2.3: Intrinsic variation of technical samples in flow cytometric patterns

To verify the reliability of cytometric measurements a sample is splitted into three parts and treated independently according to the cytometric workflow. As an outcome three parallel 2D-dot plots are produced that are evaluated by using the gate-template (see Section S2.4). Numbers of cells per gate are calculated by using the program FlowJo (FlowJo LLC, Oregon, USA). The relative abundance of a gate (i.e. cells belonging to this gate given as a fraction of the total population, expressed in %) varied between the three technical replicates, with a mean standard deviation over all gates of 0.6 %, and a maximal standard deviation of 4.5 %.

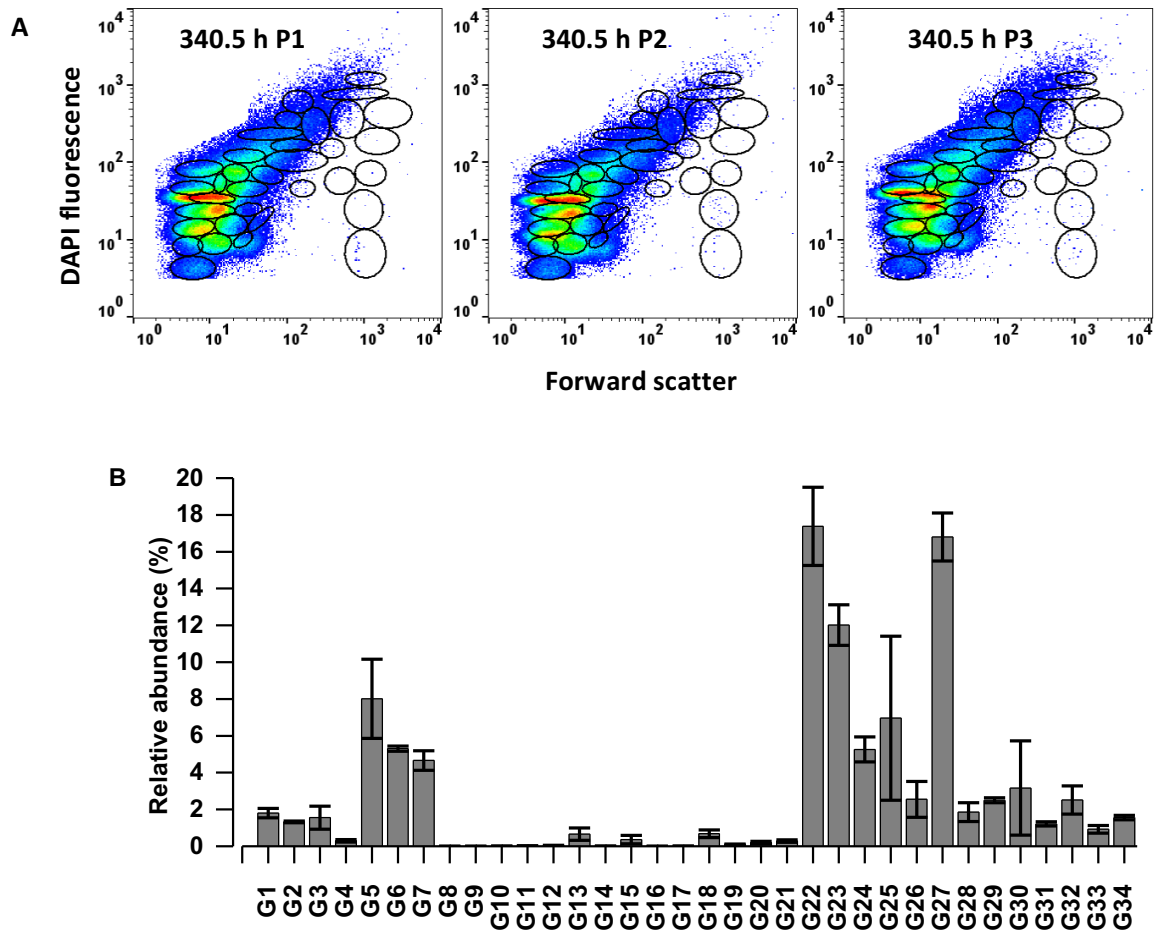

**Figure S2.2: (A)** Exemplary cytometric 2D-dot plots of three DAPI stained CMC samples (P1 - P3) which were harvested at 340.5 h. The gate-template (see Section S2.4) is shown as overlay in the 2D-dot plots. **(B)** Variation analysis of flow cytometric measurement. One sample was measured thrice and the average relative abundance as well as standard deviation calculated for each gate.

#### S2.4: Gate-template for evaluation of AMC and CMC distributions.

Gates are set according to virtual cell clusters for all measurements within the continuous reactor experiment.

Relative abundancies were determined by setting the sum of all gates as 100 %.

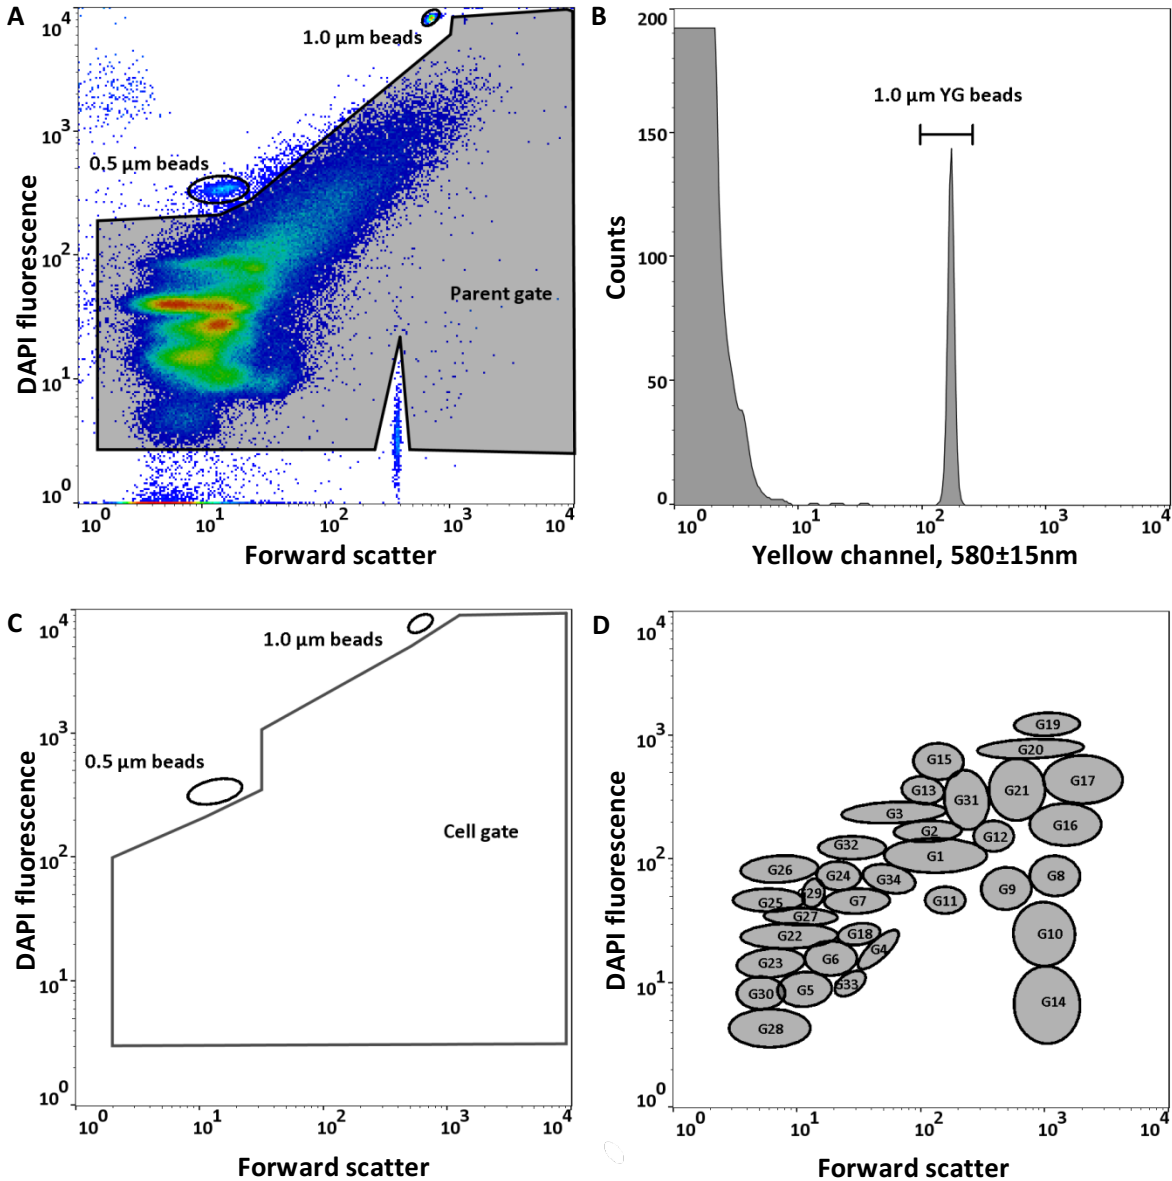

**Figure S2.3:** (A) 250 000 cells were measured for each sample using a parent gate created in Summit Ver. 4.3 (Beckman-Coulter, Brea, CA) which comprises all stained cells and excludes noise and beads. The example shows the community at hour 340.5 of the experiment. (B) For total cell number estimation 1  $\mu\text{m}$  yellow green (YG) beads were amended into each sample and the bead number measured by using gate "1.0  $\mu\text{m}$  YG beads" in the yellow channel of the flow cytometer (band pass filter  $580 \pm 15\text{ nm}$ ). Total cell counts were determined as described in Section S2.1. (C) For sample analysis the software in FlowJo V10 (FlowJo LLC, Oregon, USA) was used. Therein a cell gate similar to the parent gate used in A was created to remove virtually noise and beads from the original 2D-dot plots. (D) All 140 samples together were used to create the gate-template for the community which contained between about 200 000 and 250 000 cells of the parent gate. A gate was set wherever a new subcommunity

became apparent. The final gate-template was then applied to each sample to extract individual subcommunity abundances.

## S2.5: Tables for individual amounts of cell numbers in gates

Tables S2.1 to S2.10 show abundancies of cells per gate for all 140 cytometrically measured samples.

**Table S2.1:** Absolute cell numbers in gates from G1 to G34 of samples picked between 0 and 19 h

| Time | 0 h    | 0.5 h  | 1 h    | 1.5 h  | 2 h    | 2.5 h  | 3 h    | 3.5 h  | 4 h    | 4.5 h  | 5 h    | 5.5 h  | 6 h    | 19 h   |
|------|--------|--------|--------|--------|--------|--------|--------|--------|--------|--------|--------|--------|--------|--------|
| G1   | 2571   | 3827   | 5004   | 2340   | 3931   | 2306   | 2041   | 1956   | 1651   | 1262   | 2849   | 1488   | 2220   | 1043   |
| G2   | 464    | 798    | 867    | 544    | 900    | 506    | 539    | 799    | 1042   | 1004   | 2362   | 1572   | 2450   | 330    |
| G3   | 1130   | 1837   | 2305   | 1419   | 2006   | 2023   | 2149   | 2492   | 3283   | 2480   | 4220   | 2679   | 3578   | 444    |
| G4   | 112035 | 135893 | 132204 | 152078 | 140496 | 154234 | 153787 | 142179 | 140715 | 137985 | 128920 | 137934 | 134493 | 3685   |
| G5   | 144669 | 5752   | 4980   | 2250   | 3430   | 2171   | 1440   | 2102   | 2462   | 2007   | 3583   | 2300   | 3057   | 135353 |
| G6   | 34335  | 15765  | 23906  | 19275  | 23319  | 18273  | 16012  | 14987  | 17515  | 12681  | 28351  | 21436  | 21832  | 75195  |
| G7   | 329    | 306    | 666    | 533    | 573    | 1110   | 2675   | 1596   | 3224   | 2399   | 838    | 2275   | 1635   | 202    |
| G8   | 27     | 10     | 6      | 8      | 8      | 7      | 7      | 3      | 2      | 3      | 3      | 13     | 3      | 0      |
| G9   | 35     | 30     | 30     | 23     | 16     | 26     | 23     | 9      | 17     | 8      | 9      | 16     | 8      | 1      |
| G10  | 70     | 46     | 19     | 19     | 25     | 13     | 18     | 19     | 11     | 14     | 18     | 26     | 10     | 5      |
| G11  | 84     | 118    | 311    | 319    | 173    | 311    | 366    | 245    | 295    | 276    | 258    | 266    | 257    | 20     |
| G12  | 65     | 61     | 54     | 68     | 26     | 23     | 40     | 23     | 37     | 34     | 12     | 24     | 20     | 15     |
| G13  | 115    | 147    | 218    | 222    | 291    | 852    | 883    | 1256   | 1455   | 1039   | 966    | 742    | 988    | 48     |
| G14  | 94     | 30     | 30     | 44     | 34     | 28     | 28     | 30     | 31     | 23     | 28     | 36     | 34     | 10     |
| G15  | 55     | 60     | 84     | 91     | 45     | 181    | 316    | 286    | 359    | 320    | 285    | 291    | 396    | 24     |
| G16  | 29     | 18     | 17     | 10     | 13     | 9      | 11     | 11     | 8      | 17     | 3      | 9      | 17     | 1      |
| G17  | 37     | 35     | 18     | 35     | 21     | 6      | 19     | 9      | 16     | 24     | 4      | 7      | 5      | 2      |
| G18  | 10053  | 3592   | 11300  | 8057   | 8994   | 11676  | 12456  | 6647   | 10133  | 6659   | 12442  | 9844   | 9714   | 4522   |
| G19  | 41     | 48     | 78     | 154    | 44     | 51     | 75     | 57     | 80     | 76     | 37     | 68     | 121    | 16     |
| G20  | 73     | 105    | 127    | 225    | 34     | 78     | 137    | 64     | 120    | 97     | 44     | 121    | 170    | 19     |
| G21  | 198    | 276    | 261    | 263    | 60     | 115    | 162    | 69     | 110    | 117    | 65     | 128    | 101    | 47     |
| G22  | 246    | 208    | 800    | 311    | 676    | 475    | 317    | 509    | 356    | 263    | 625    | 372    | 436    | 671    |
| G23  | 241    | 138    | 456    | 219    | 284    | 280    | 215    | 329    | 320    | 117    | 297    | 168    | 128    | 1314   |
| G24  | 114    | 131    | 381    | 148    | 330    | 228    | 178    | 208    | 176    | 123    | 260    | 187    | 219    | 20     |
| G25  | 18     | 11     | 72     | 44     | 46     | 31     | 32     | 38     | 45     | 14     | 27     | 22     | 17     | 41     |
| G26  | 16     | 19     | 67     | 23     | 26     | 43     | 43     | 43     | 16     | 15     | 25     | 19     | 8      | 50     |
| G27  | 111    | 89     | 448    | 187    | 370    | 288    | 195    | 276    | 255    | 157    | 334    | 254    | 250    | 77     |
| G28  | 559    | 394    | 905    | 591    | 717    | 687    | 444    | 746    | 512    | 251    | 503    | 369    | 347    | 507    |
| G29  | 34     | 30     | 168    | 46     | 121    | 82     | 57     | 94     | 82     | 48     | 83     | 88     | 93     | 11     |
| G30  | 727    | 235    | 513    | 301    | 315    | 321    | 236    | 366    | 380    | 190    | 260    | 205    | 133    | 16898  |
| G31  | 449    | 559    | 615    | 603    | 278    | 316    | 376    | 315    | 417    | 348    | 341    | 508    | 548    | 128    |
| G32  | 167    | 302    | 588    | 238    | 566    | 430    | 302    | 297    | 234    | 133    | 370    | 103    | 103    | 118    |
| G33  | 50182  | 53168  | 41983  | 34048  | 37327  | 27576  | 21833  | 30600  | 25003  | 31097  | 32264  | 31421  | 33944  | 5487   |
| G34  | 158    | 145    | 249    | 173    | 301    | 234    | 217    | 211    | 279    | 201    | 114    | 287    | 205    | 47     |
| Sum  | 229331 | 224183 | 229730 | 224909 | 225796 | 224990 | 217629 | 208871 | 210641 | 201482 | 220800 | 215278 | 217540 | 246351 |

**Table S2.2:** Absolute cell numbers in gates from G1 to G34 of samples picked between 21 and 67 h

| Time | 21 h   | 23 h   | 25 h   | 27 h   | 28.5 h | 29.5 h | 43 h   | 45 h   | 47 h   | 49 h   | 51 h   | 53 h   | 55 h   | 67 h  |
|------|--------|--------|--------|--------|--------|--------|--------|--------|--------|--------|--------|--------|--------|-------|
| G1   | 852    | 666    | 444    | 581    | 753    | 761    | 1349   | 972    | 380    | 1652   | 344    | 413    | 565    | 4965  |
| G2   | 255    | 139    | 127    | 119    | 177    | 287    | 119    | 81     | 69     | 127    | 56     | 57     | 56     | 1044  |
| G3   | 293    | 153    | 212    | 154    | 123    | 99     | 46     | 19     | 19     | 27     | 19     | 16     | 17     | 386   |
| G4   | 2675   | 1140   | 552    | 601    | 380    | 662    | 982    | 1533   | 1735   | 675    | 1084   | 805    | 354    | 2770  |
| G5   | 130329 | 131491 | 139140 | 151729 | 150304 | 152238 | 119730 | 106004 | 111081 | 117208 | 107493 | 101046 | 90556  | 41523 |
| G6   | 81009  | 79450  | 61940  | 54528  | 58587  | 53036  | 88388  | 70235  | 87305  | 79272  | 96936  | 103064 | 106370 | 50991 |
| G7   | 125    | 240    | 211    | 103    | 246    | 154    | 118    | 66     | 105    | 113    | 132    | 128    | 88     | 4305  |
| G8   | 0      | 1      | 1      | 0      | 3      | 3      | 1      | 0      | 0      | 12     | 0      | 0      | 8      | 109   |
| G9   | 1      | 0      | 3      | 4      | 0      | 3      | 12     | 11     | 1      | 41     | 2      | 1      | 9      | 72    |
| G10  | 7      | 1      | 1      | 6      | 2      | 8      | 8      | 2      | 6      | 1      | 6      | 6      | 11     | 59    |
| G11  | 15     | 30     | 41     | 38     | 37     | 31     | 39     | 69     | 60     | 63     | 36     | 54     | 48     | 236   |
| G12  | 15     | 31     | 31     | 32     | 43     | 25     | 45     | 60     | 53     | 103    | 39     | 41     | 53     | 316   |
| G13  | 54     | 33     | 30     | 13     | 15     | 12     | 15     | 7      | 1      | 6      | 5      | 4      | 4      | 124   |
| G14  | 11     | 16     | 14     | 18     | 10     | 7      | 7      | 14     | 13     | 16     | 14     | 9      | 8      | 154   |
| G15  | 16     | 18     | 8      | 10     | 2      | 1      | 1      | 2      | 2      | 0      | 1      | 1      | 3      | 29    |
| G16  | 1      | 0      | 2      | 3      | 4      | 2      | 1      | 8      | 2      | 12     | 1      | 1      | 4      | 94    |
| G17  | 3      | 1      | 4      | 4      | 6      | 4      | 1      | 16     | 6      | 12     | 5      | 7      | 16     | 103   |
| G18  | 2919   | 3917   | 3390   | 1787   | 2646   | 1501   | 2314   | 454    | 917    | 735    | 1114   | 1002   | 887    | 2846  |
| G19  | 15     | 18     | 7      | 7      | 4      | 2      | 3      | 5      | 13     | 4      | 11     | 5      | 8      | 31    |
| G20  | 21     | 28     | 16     | 19     | 16     | 5      | 7      | 16     | 30     | 10     | 25     | 19     | 16     | 116   |
| G21  | 57     | 79     | 43     | 58     | 41     | 35     | 41     | 93     | 87     | 115    | 56     | 62     | 76     | 582   |
| G22  | 849    | 1879   | 2727   | 1364   | 2775   | 1245   | 2056   | 313    | 528    | 538    | 854    | 790    | 1456   | 14214 |
| G23  | 1249   | 2675   | 4612   | 2675   | 4523   | 2496   | 5269   | 1299   | 1847   | 2628   | 2770   | 3536   | 7432   | 38318 |
| G24  | 14     | 28     | 21     | 18     | 34     | 26     | 9      | 3      | 17     | 8      | 5      | 9      | 10     | 1024  |
| G25  | 18     | 20     | 17     | 13     | 17     | 16     | 2      | 4      | 3      | 6      | 9      | 3      | 3      | 333   |
| G26  | 15     | 13     | 15     | 3      | 8      | 10     | 2      | 2      | 1      | 1      | 1      | 1      | 2      | 121   |
| G27  | 92     | 216    | 151    | 112    | 244    | 117    | 145    | 33     | 72     | 57     | 96     | 88     | 98     | 3052  |



|     |        |        |        |        |        |        |        |        |        |        |        |        |        |        |
|-----|--------|--------|--------|--------|--------|--------|--------|--------|--------|--------|--------|--------|--------|--------|
| G28 | 884    | 612    | 1170   | 1017   | 359    | 1311   | 1260   | 13899  | 6952   | 5881   | 5025   | 5776   | 5233   | 6783   |
| G29 | 8      | 11     | 12     | 12     | 11     | 19     | 9      | 6      | 3      | 5      | 4      | 6      | 7      | 494    |
| G30 | 21292  | 29733  | 43329  | 40639  | 35624  | 36960  | 32632  | 20378  | 23216  | 34774  | 25747  | 24636  | 33130  | 61240  |
| G31 | 133    | 135    | 88     | 97     | 80     | 56     | 48     | 67     | 63     | 85     | 71     | 66     | 63     | 859    |
| G32 | 89     | 27     | 16     | 15     | 26     | 42     | 18     | 5      | 4      | 14     | 5      | 8      | 10     | 545    |
| G33 | 4502   | 2127   | 924    | 1716   | 1691   | 2420   | 762    | 6732   | 3167   | 1571   | 1711   | 1695   | 1114   | 1404   |
| G34 | 36     | 70     | 67     | 62     | 104    | 88     | 62     | 29     | 74     | 70     | 63     | 76     | 51     | 2193   |
| Sum | 247854 | 254998 | 259366 | 257557 | 258895 | 253682 | 255501 | 222437 | 237832 | 245842 | 243740 | 243431 | 247766 | 241435 |

**Table S2.3: Absolute cell numbers in gates from G1 to G34 of samples picked between 69 and 78.5 h**

| Time | 69 h   | 71 h   | 73 h   | 73.5 h | 74 h   | 74.5 h | 75 h   | 75.5 h | 76 h   | 76.5 h | 77 h   | 77.5 h | 78 h   | 78.5 h |
|------|--------|--------|--------|--------|--------|--------|--------|--------|--------|--------|--------|--------|--------|--------|
| G1   | 1900   | 8843   | 4124   | 1705   | 1120   | 4306   | 5372   | 1304   | 3039   | 3012   | 5247   | 3975   | 1846   | 5560   |
| G2   | 167    | 624    | 629    | 244    | 223    | 548    | 1331   | 650    | 1513   | 1972   | 3355   | 2350   | 653    | 1415   |
| G3   | 50     | 161    | 224    | 89     | 86     | 203    | 310    | 157    | 191    | 427    | 2108   | 784    | 308    | 506    |
| G4   | 5216   | 2363   | 2067   | 3304   | 3616   | 3600   | 1716   | 2166   | 2149   | 1667   | 1174   | 1365   | 1724   | 1265   |
| G5   | 58489  | 42220  | 57780  | 63621  | 67200  | 59536  | 53317  | 59772  | 61477  | 56822  | 62172  | 59160  | 67387  | 61107  |
| G6   | 87901  | 56481  | 67254  | 88343  | 95897  | 84726  | 55121  | 96438  | 76951  | 63565  | 68443  | 68052  | 83645  | 64428  |
| G7   | 596    | 2092   | 1849   | 1009   | 1199   | 999    | 2686   | 939    | 684    | 1527   | 1881   | 1337   | 1467   | 1947   |
| G8   | 101    | 6021   | 475    | 40     | 14     | 1172   | 325    | 14     | 589    | 1476   | 1226   | 58     | 52     | 806    |
| G9   | 113    | 4607   | 236    | 27     | 18     | 661    | 164    | 12     | 431    | 874    | 602    | 31     | 18     | 389    |
| G10  | 268    | 1353   | 222    | 411    | 432    | 875    | 296    | 726    | 625    | 786    | 1085   | 692    | 868    | 747    |
| G11  | 91     | 1382   | 91     | 48     | 57     | 238    | 107    | 16     | 57     | 80     | 69     | 92     | 67     | 101    |
| G12  | 129    | 886    | 283    | 69     | 80     | 231    | 587    | 42     | 149    | 241    | 509    | 269    | 144    | 317    |
| G13  | 12     | 45     | 54     | 37     | 48     | 62     | 69     | 77     | 64     | 119    | 206    | 177    | 138    | 155    |
| G14  | 25     | 195    | 258    | 81     | 110    | 63     | 118    | 139    | 140    | 150    | 70     | 156    | 212    | 412    |
| G15  | 8      | 5      | 10     | 15     | 10     | 24     | 11     | 28     | 16     | 34     | 37     | 42     | 73     | 41     |
| G16  | 16     | 1447   | 163    | 18     | 10     | 203    | 81     | 5      | 104    | 249    | 186    | 40     | 16     | 217    |
| G17  | 18     | 538    | 121    | 22     | 30     | 117    | 61     | 11     | 80     | 160    | 174    | 40     | 37     | 147    |
| G18  | 1548   | 1417   | 1960   | 1476   | 1847   | 1796   | 2911   | 5537   | 1284   | 1849   | 2159   | 1889   | 1919   | 1987   |
| G19  | 22     | 18     | 32     | 23     | 29     | 75     | 48     | 43     | 61     | 74     | 88     | 66     | 112    | 52     |
| G20  | 34     | 62     | 79     | 51     | 66     | 113    | 66     | 100    | 121    | 117    | 165    | 160    | 196    | 146    |
| G21  | 171    | 753    | 544    | 151    | 144    | 418    | 596    | 235    | 389    | 553    | 806    | 581    | 403    | 786    |
| G22  | 13949  | 12227  | 14063  | 5595   | 10035  | 12230  | 8809   | 34842  | 4429   | 5960   | 16343  | 7811   | 7756   | 8699   |
| G23  | 29043  | 30665  | 30033  | 25711  | 20916  | 25732  | 39066  | 17992  | 33045  | 32703  | 27451  | 34732  | 25026  | 28307  |
| G24  | 72     | 469    | 372    | 178    | 253    | 202    | 259    | 94     | 123    | 294    | 202    | 186    | 281    | 429    |
| G25  | 67     | 930    | 284    | 120    | 169    | 111    | 161    | 98     | 54     | 167    | 169    | 110    | 98     | 218    |
| G26  | 8      | 77     | 46     | 17     | 22     | 16     | 26     | 11     | 9      | 32     | 30     | 12     | 23     | 58     |
| G27  | 761    | 2231   | 2193   | 1179   | 1570   | 992    | 1679   | 847    | 687    | 1248   | 1201   | 1133   | 1209   | 1630   |
| G28  | 2231   | 9343   | 5180   | 7582   | 2124   | 3397   | 9165   | 535    | 7701   | 11790  | 2896   | 6666   | 3268   | 6809   |
| G29  | 57     | 484    | 289    | 162    | 174    | 147    | 173    | 70     | 69     | 219    | 132    | 118    | 177    | 310    |
| G30  | 42823  | 47892  | 54149  | 37468  | 38218  | 40703  | 52351  | 33740  | 44279  | 48832  | 47554  | 50147  | 45454  | 54016  |
| G31  | 165    | 526    | 582    | 247    | 225    | 488    | 1005   | 323    | 487    | 836    | 1793   | 1139   | 774    | 1047   |
| G32  | 35     | 171    | 113    | 77     | 72     | 116    | 125    | 29     | 68     | 134    | 175    | 89     | 143    | 135    |
| G33  | 2023   | 1334   | 1199   | 3316   | 1910   | 1915   | 1632   | 982    | 1942   | 1813   | 796    | 1101   | 1175   | 885    |
| G34  | 295    | 941    | 787    | 476    | 489    | 622    | 1772   | 333    | 414    | 813    | 1339   | 781    | 1003   | 989    |
| Sum  | 248404 | 238803 | 247745 | 242912 | 248413 | 246637 | 241516 | 258307 | 243421 | 240595 | 251843 | 245341 | 247672 | 246063 |

**Table S2.4: Absolute cell numbers in gates from G1 to G34 of samples picked between 79 and 172.5 h**

| Time | 79 h  | 91 h  | 93 h  | 95 h  | 97 h  | 99 h  | 101 h | 169 h | 170 h | 170.5 h | 171 h | 171.5 h | 172 h | 172.5 h |
|------|-------|-------|-------|-------|-------|-------|-------|-------|-------|---------|-------|---------|-------|---------|
| G1   | 9506  | 24449 | 27785 | 20746 | 42056 | 57005 | 43646 | 2599  | 2738  | 3874    | 3844  | 5487    | 4174  | 2685    |
| G2   | 1968  | 1423  | 2481  | 1899  | 4952  | 8806  | 14034 | 9311  | 9417  | 10487   | 10501 | 16250   | 12061 | 8175    |
| G3   | 1036  | 397   | 438   | 701   | 1867  | 3519  | 11054 | 13327 | 10103 | 11857   | 10868 | 11338   | 4360  | 6918    |
| G4   | 421   | 284   | 409   | 479   | 805   | 1300  | 230   | 271   | 378   | 409     | 720   | 279     | 478   | 347     |
| G5   | 50008 | 61942 | 54806 | 54521 | 44959 | 40584 | 32954 | 793   | 991   | 1198    | 1588  | 323     | 677   | 744     |
| G6   | 53744 | 51129 | 35329 | 44504 | 33470 | 27706 | 21818 | 367   | 526   | 575     | 788   | 199     | 553   | 358     |
| G7   | 2501  | 987   | 1370  | 1204  | 982   | 550   | 301   | 122   | 278   | 232     | 340   | 161     | 382   | 111     |
| G8   | 1468  | 238   | 704   | 241   | 1877  | 1318  | 1596  | 2245  | 5991  | 4981    | 6021  | 3436    | 4861  | 3952    |
| G9   | 299   | 144   | 1613  | 394   | 1276  | 721   | 720   | 1532  | 2458  | 2336    | 3332  | 1963    | 2324  | 2472    |
| G10  | 631   | 7520  | 7369  | 11792 | 12308 | 6934  | 12160 | 13653 | 14957 | 15869   | 16388 | 11309   | 15463 | 17364   |
| G11  | 95    | 1755  | 1790  | 642   | 1155  | 1034  | 441   | 227   | 308   | 419     | 496   | 388     | 696   | 447     |
| G12  | 298   | 929   | 1902  | 1003  | 1115  | 1963  | 274   | 2289  | 2116  | 2210    | 2192  | 3140    | 3592  | 2436    |
| G13  | 231   | 93    | 114   | 251   | 2077  | 7513  | 17024 | 28013 | 23810 | 24928   | 23741 | 27296   | 15618 | 26719   |
| G14  | 484   | 392   | 749   | 834   | 505   | 3536  | 799   | 2492  | 2901  | 3713    | 2892  | 13263   | 4107  | 5222    |
| G15  | 69    | 29    | 18    | 80    | 659   | 3601  | 11133 | 15486 | 14582 | 13486   | 14276 | 10241   | 11724 | 11965   |
| G16  | 279   | 97    | 337   | 192   | 254   | 327   | 123   | 13460 | 2973  | 2507    | 2765  | 1303    | 2021  | 1603    |
| G17  | 140   | 370   | 510   | 774   | 703   | 725   | 109   | 7770  | 2140  | 1681    | 1827  | 1276    | 1184  | 910     |
| G18  | 1346  | 2062  | 1524  | 2484  | 1834  | 1300  | 501   | 116   | 247   | 248     | 337   | 131     | 426   | 134     |
| G19  | 90    | 327   | 257   | 578   | 658   | 548   | 156   | 1611  | 1275  | 753     | 1169  | 432     | 777   | 644     |
| G20  | 145   | 576   | 537   | 982   | 1331  | 1267  | 508   | 4396  | 3513  | 2710    | 3281  | 1742    | 2885  | 2238    |
| G21  | 670   | 2126  | 2784  | 3886  | 4048  | 4479  | 1372  | 19496 | 17374 | 14859   | 13919 | 14500   | 17998 | 14124   |
| G22  | 13210 | 15176 | 5857  | 19507 | 11593 | 3363  | 9012  | 237   | 1713  | 1782    | 715   | 95      | 618   | 182     |
| G23  | 36663 | 26033 | 24341 | 27890 | 22383 | 12272 | 17675 | 380   | 2293  | 2844    | 966   | 132     | 591   | 303     |
| G24  | 764   | 156   | 220   | 156   | 164   | 108   | 489   | 76    | 317   | 294     | 402   | 239     | 86    | 39      |
| G25  | 548   | 56    | 122   | 44    | 81    | 19    | 89    | 32    | 1005  | 850     | 279   | 80      | 103   | 22      |
| G26  | 126   | 10    | 29    | 16    | 55    | 11    | 158   | 33    | 796   | 705     | 281   | 371     | 61    | 19      |
| G27  | 3079  | 489   | 900   | 690   | 511   | 166   | 192   | 81    | 581   | 502     | 296   | 75      | 216   | 78      |
| G28  | 7234  | 1824  | 12545 | 1876  | 3855  | 4489  | 3680  | 1256  | 2849  | 3590    | 4157  | 447     | 1612  | 1512    |
| G29  | 509   | 68    | 150   | 89    | 67    | 31    | 139   | 30    | 153   | 129     | 114   | 87      | 36    | 18      |

|            |               |               |               |               |               |               |               |               |               |               |               |               |               |               |
|------------|---------------|---------------|---------------|---------------|---------------|---------------|---------------|---------------|---------------|---------------|---------------|---------------|---------------|---------------|
| <b>G30</b> | 55841         | 46663         | 50297         | 47514         | 41466         | 29359         | 30737         | 679           | 2581          | 3776          | 1847          | 253           | 955           | 601           |
| <b>G31</b> | 1263          | 1467          | 2000          | 2458          | 4007          | 6034          | 7287          | 66402         | 81836         | 80145         | 72767         | 104299        | 104191        | 101677        |
| <b>G32</b> | 383           | 84            | 91            | 110           | 329           | 556           | 1398          | 159           | 501           | 681           | 811           | 343           | 117           | 94            |
| <b>G33</b> | 273           | 246           | 440           | 357           | 584           | 1186          | 237           | 170           | 288           | 280           | 651           | 170           | 218           | 356           |
| <b>G34</b> | 1302          | 510           | 951           | 695           | 882           | 731           | 640           | 173           | 331           | 427           | 561           | 402           | 359           | 122           |
| <b>Sum</b> | <b>246624</b> | <b>250051</b> | <b>240769</b> | <b>249589</b> | <b>244868</b> | <b>233061</b> | <b>242686</b> | <b>209284</b> | <b>214320</b> | <b>215337</b> | <b>205132</b> | <b>231450</b> | <b>215524</b> | <b>214591</b> |

**Table S2.5: Absolute cell numbers in gates from G1 to G34 of samples picked between 173 and 199 h**

| Time       | 173 h         | 173.5 h       | 174 h         | 174.5 h       | 175 h         | 175.5 h       | 176 h         | 187 h         | 189 h         | 191 h         | 193 h         | 195 h         | 197 h         | 199 h         |
|------------|---------------|---------------|---------------|---------------|---------------|---------------|---------------|---------------|---------------|---------------|---------------|---------------|---------------|---------------|
| G1         | 3361          | 3173          | 1450          | 2343          | 760           | 1305          | 2257          | 1210          | 1136          | 945           | 1347          | 1161          | 1710          | 2047          |
| G2         | 4010          | 2719          | 912           | 1514          | 383           | 375           | 1044          | 348           | 534           | 423           | 771           | 799           | 681           | 1197          |
| G3         | 1574          | 1000          | 465           | 969           | 214           | 223           | 774           | 239           | 363           | 347           | 641           | 763           | 398           | 674           |
| G4         | 141           | 226           | 87            | 123           | 82            | 69            | 91            | 65            | 146           | 96            | 146           | 232           | 136           | 59            |
| G5         | 286           | 668           | 219           | 387           | 269           | 119           | 224           | 184           | 514           | 342           | 456           | 1099          | 351           | 176           |
| G6         | 166           | 327           | 110           | 177           | 128           | 53            | 116           | 119           | 250           | 191           | 237           | 996           | 249           | 99            |
| G7         | 77            | 99            | 28            | 99            | 33            | 48            | 164           | 60            | 61            | 113           | 108           | 121           | 207           | 66            |
| G8         | 3223          | 3548          | 2129          | 3235          | 1754          | 1014          | 1292          | 2284          | 2410          | 1685          | 1409          | 878           | 2438          | 1798          |
| G9         | 1527          | 2032          | 1215          | 1921          | 1102          | 593           | 1080          | 1203          | 905           | 609           | 1038          | 751           | 724           | 692           |
| G10        | 18379         | 14463         | 11740         | 19154         | 10513         | 7433          | 9264          | 10506         | 10220         | 5141          | 10181         | 7118          | 6579          | 9953          |
| G11        | 297           | 243           | 134           | 216           | 106           | 176           | 292           | 269           | 185           | 109           | 169           | 109           | 221           | 147           |
| G12        | 3226          | 6185          | 9576          | 13285         | 7585          | 15956         | 6723          | 1310          | 1188          | 850           | 1325          | 876           | 1585          | 1821          |
| G13        | 14826         | 7119          | 2583          | 970           | 247           | 136           | 311           | 165           | 238           | 144           | 165           | 198           | 135           | 149           |
| G14        | 6666          | 4388          | 3370          | 6624          | 3049          | 2586          | 9046          | 4313          | 3610          | 1351          | 3347          | 1663          | 3085          | 5232          |
| G15        | 29585         | 18357         | 15200         | 3558          | 1659          | 552           | 740           | 479           | 462           | 539           | 419           | 303           | 193           | 201           |
| G16        | 1080          | 1195          | 840           | 1129          | 835           | 1476          | 977           | 114973        | 89035         | 127111        | 71631         | 92762         | 131781        | 129573        |
| G17        | 772           | 1532          | 994           | 4160          | 3516          | 7629          | 9389          | 20773         | 26538         | 21805         | 33365         | 29363         | 24430         | 20554         |
| G18        | 56            | 106           | 46            | 70            | 53            | 29            | 50            | 44            | 86            | 83            | 70            | 230           | 103           | 34            |
| G19        | 1066          | 3850          | 1185          | 8212          | 2252          | 1580          | 10221         | 2563          | 3454          | 2707          | 7262          | 8828          | 6399          | 6521          |
| G20        | 3213          | 7181          | 6780          | 14391         | 8998          | 6330          | 19037         | 9535          | 11306         | 11403         | 16573         | 14519         | 9751          | 7729          |
| G21        | 22876         | 30616         | 83676         | 66729         | 149104        | 160715        | 104997        | 40411         | 42061         | 36509         | 32910         | 26296         | 16425         | 21309         |
| G22        | 176           | 425           | 198           | 153           | 91            | 68            | 90            | 132           | 188           | 164           | 167           | 977           | 604           | 147           |
| G23        | 173           | 628           | 285           | 270           | 154           | 83            | 127           | 160           | 285           | 280           | 267           | 623           | 1018          | 158           |
| G24        | 57            | 53            | 24            | 254           | 14            | 66            | 796           | 81            | 34            | 28            | 125           | 78            | 85            | 22            |
| G25        | 29            | 140           | 56            | 46            | 13            | 23            | 80            | 40            | 75            | 28            | 35            | 62            | 66            | 31            |
| G26        | 30            | 61            | 40            | 200           | 12            | 38            | 364           | 18            | 17            | 12            | 26            | 20            | 37            | 6             |
| G27        | 82            | 118           | 39            | 70            | 32            | 29            | 105           | 87            | 78            | 50            | 60            | 145           | 266           | 72            |
| G28        | 732           | 2069          | 805           | 1491          | 860           | 400           | 901           | 748           | 1951          | 1248          | 2025          | 2557          | 1251          | 836           |
| G29        | 19            | 30            | 9             | 44            | 10            | 13            | 106           | 30            | 23            | 15            | 26            | 50            | 44            | 15            |
| G30        | 318           | 1024          | 526           | 517           | 331           | 177           | 301           | 203           | 534           | 409           | 517           | 918           | 460           | 204           |
| G31        | 96684         | 86471         | 87569         | 46162         | 24205         | 12595         | 9277          | 1985          | 1749          | 1569          | 1228          | 693           | 819           | 878           |
| G32        | 65            | 69            | 47            | 204           | 18            | 100           | 558           | 118           | 25            | 28            | 78            | 64            | 63            | 44            |
| G33        | 103           | 229           | 66            | 148           | 93            | 40            | 99            | 68            | 144           | 98            | 114           | 182           | 115           | 52            |
| G34        | 120           | 90            | 63            | 172           | 43            | 125           | 276           | 155           | 54            | 108           | 122           | 110           | 237           | 123           |
| <b>Sum</b> | <b>214995</b> | <b>200434</b> | <b>232466</b> | <b>198997</b> | <b>218518</b> | <b>222154</b> | <b>191169</b> | <b>214878</b> | <b>199859</b> | <b>216540</b> | <b>188360</b> | <b>195544</b> | <b>212646</b> | <b>212619</b> |

**Table S2.6: Absolute cell numbers in gates from G1 to G34 of samples picked between 211 and 221 h**

| Time | 211 h | 213 h | 215 h | 216 h | 216.5 h | 217 h | 217.5 h | 218 h | 218.5 h | 219 h | 219.5 h | 220 h | 220.5 h | 221 h |
|------|-------|-------|-------|-------|---------|-------|---------|-------|---------|-------|---------|-------|---------|-------|
| G1   | 6095  | 3148  | 2658  | 1744  | 2493    | 2973  | 1642    | 2281  | 2139    | 1928  | 1714    | 1339  | 996     | 3143  |
| G2   | 4768  | 3804  | 2029  | 751   | 1216    | 1164  | 670     | 1063  | 980     | 684   | 865     | 679   | 549     | 1731  |
| G3   | 4836  | 6468  | 1312  | 599   | 868     | 823   | 470     | 748   | 798     | 604   | 747     | 551   | 512     | 1698  |
| G4   | 413   | 370   | 136   | 381   | 268     | 222   | 190     | 185   | 168     | 390   | 166     | 167   | 149     | 701   |
| G5   | 1447  | 2841  | 174   | 804   | 1130    | 317   | 255     | 238   | 345     | 1515  | 607     | 798   | 853     | 1854  |
| G6   | 1334  | 2294  | 128   | 945   | 619     | 471   | 302     | 320   | 361     | 830   | 491     | 429   | 512     | 1170  |
| G7   | 630   | 2483  | 69    | 1075  | 1073    | 1511  | 762     | 1135  | 1039    | 1127  | 2233    | 943   | 779     | 1548  |
| G8   | 1974  | 1270  | 524   | 695   | 705     | 772   | 545     | 577   | 690     | 600   | 405     | 448   | 338     | 389   |
| G9   | 1506  | 1127  | 1030  | 746   | 811     | 559   | 471     | 574   | 1157    | 574   | 743     | 512   | 365     | 694   |
| G10  | 21804 | 8688  | 2059  | 3621  | 3242    | 5224  | 4229    | 4109  | 4971    | 8354  | 3391    | 5018  | 4700    | 3105  |
| G11  | 415   | 205   | 196   | 294   | 220     | 236   | 160     | 186   | 255     | 178   | 129     | 164   | 91      | 310   |
| G12  | 3547  | 1774  | 19724 | 6635  | 14058   | 8785  | 14906   | 8154  | 7087    | 3206  | 3187    | 2358  | 1319    | 2195  |
| G13  | 6344  | 16317 | 7514  | 3181  | 3001    | 2537  | 2679    | 2159  | 1827    | 1147  | 836     | 975   | 818     | 933   |
| G14  | 11332 | 2766  | 950   | 2049  | 1393    | 1992  | 1705    | 1447  | 1921    | 2602  | 1360    | 2307  | 1952    | 1661  |
| G15  | 9066  | 16744 | 8639  | 10587 | 4349    | 5150  | 5059    | 4392  | 4276    | 4445  | 3342    | 4311  | 3483    | 1470  |
| G16  | 52745 | 31448 | 25842 | 19472 | 17365   | 23536 | 21139   | 19665 | 17777   | 16560 | 14513   | 17852 | 16771   | 19698 |
| G17  | 13474 | 6535  | 3203  | 5933  | 12542   | 9223  | 4914    | 9113  | 8752    | 9147  | 10860   | 10358 | 13396   | 16682 |
| G18  | 374   | 695   | 62    | 467   | 384     | 379   | 276     | 309   | 322     | 324   | 548     | 268   | 229     | 761   |
| G19  | 1507  | 2192  | 1559  | 4385  | 3147    | 9055  | 2557    | 11515 | 10966   | 12792 | 2531    | 10886 | 12279   | 4409  |
| G20  | 2647  | 3747  | 4847  | 12706 | 8271    | 18972 | 7987    | 20529 | 20472   | 22759 | 11801   | 25066 | 29029   | 13279 |
| G21  | 9305  | 8163  | 59137 | 74156 | 80337   | 61916 | 101480  | 67235 | 72804   | 72877 | 118235  | 93690 | 93356   | 91720 |
| G22  | 5777  | 24996 | 279   | 2028  | 2341    | 750   | 640     | 287   | 541     | 362   | 2361    | 255   | 377     | 683   |
| G23  | 3168  | 15142 | 419   | 1287  | 3342    | 416   | 446     | 174   | 361     | 332   | 274     | 117   | 89      | 753   |
| G24  | 568   | 1380  | 28    | 322   | 269     | 230   | 139     | 228   | 216     | 214   | 2983    | 509   | 557     | 388   |
| G25  | 991   | 1894  | 149   | 582   | 964     | 155   | 105     | 112   | 82      | 85    | 5495    | 706   | 958     | 404   |
| G26  | 266   | 182   | 69    | 128   | 576     | 78    | 23      | 61    | 57      | 74    | 692     | 172   | 180     | 129   |
| G27  | 2595  | 10954 | 51    | 1324  | 798     | 473   | 368     | 204   | 303     | 182   | 12318   | 926   | 1454    | 404   |
| G28  | 1810  | 3202  | 510   | 768   | 3932    | 434   | 442     | 380   | 559     | 1658  | 482     | 386   | 304     | 5138  |
| G29  | 622   | 2421  | 9     | 279   | 198     | 104   | 59      | 85    | 94      | 85    | 2015    | 280   | 370     | 222   |
| G30  | 923   | 1628  | 419   | 553   | 3599    | 135   | 147     | 139   | 186     | 639   | 321     | 211   | 204     | 1451  |
| G31  | 9211  | 18502 | 77156 | 50585 | 42269   | 34077 | 47169   | 32174 | 29909   | 17587 | 16327   | 15000 | 10609   | 9832  |
| G32  | 527   | 348   | 47    | 190   | 184     | 122   | 52      | 98    | 121     | 165   | 673     | 233   | 324     | 284   |

|            |               |               |               |               |               |               |               |               |               |               |               |               |               |               |
|------------|---------------|---------------|---------------|---------------|---------------|---------------|---------------|---------------|---------------|---------------|---------------|---------------|---------------|---------------|
| G33        | 345           | 360           | 66            | 163           | 169           | 127           | 89            | 92            | 109           | 217           | 105           | 99            | 83            | 540           |
| G34        | 592           | 1005          | 116           | 1006          | 1242          | 1969          | 955           | 1490          | 1377          | 1200          | 1066          | 910           | 660           | 1636          |
| <b>Sum</b> | <b>182958</b> | <b>205093</b> | <b>221110</b> | <b>210441</b> | <b>217375</b> | <b>194887</b> | <b>223032</b> | <b>191458</b> | <b>193022</b> | <b>185443</b> | <b>223816</b> | <b>198923</b> | <b>198645</b> | <b>191015</b> |

**Table S2.7: Absolute cell numbers in gates from G1 to G34 of samples picked between 221.5 and 267 h**

| Time       | 221.5 h       | 222 h         | 223 h         | 236 h         | 238 h         | 240 h         | 242 h         | 244 h         | 246 h         | 259 h         | 261 h         | 263 h         | 265 h         | 267 h         |
|------------|---------------|---------------|---------------|---------------|---------------|---------------|---------------|---------------|---------------|---------------|---------------|---------------|---------------|---------------|
| G1         | 993           | 860           | 816           | 7002          | 4281          | 3011          | 2817          | 2612          | 2022          | 1214          | 1480          | 1208          | 1289          | 1129          |
| G2         | 579           | 683           | 567           | 4206          | 2888          | 1854          | 2064          | 1744          | 1143          | 982           | 1103          | 1077          | 1156          | 1001          |
| G3         | 571           | 671           | 517           | 7103          | 6185          | 4543          | 4625          | 4358          | 3477          | 4233          | 3827          | 3555          | 4022          | 4119          |
| G4         | 133           | 114           | 90            | 729           | 1116          | 515           | 958           | 1696          | 322           | 419           | 325           | 405           | 437           | 225           |
| G5         | 714           | 876           | 678           | 370           | 434           | 655           | 530           | 777           | 1232          | 2601          | 2334          | 2764          | 3441          | 2760          |
| G6         | 399           | 506           | 381           | 1247          | 4457          | 2971          | 4392          | 7319          | 2964          | 3505          | 3250          | 3489          | 4634          | 3130          |
| G7         | 1102          | 824           | 896           | 35427         | 23506         | 12945         | 14036         | 11805         | 7927          | 6155          | 6024          | 6708          | 7546          | 4998          |
| G8         | 381           | 395           | 436           | 180           | 223           | 202           | 174           | 112           | 129           | 63            | 79            | 41            | 33            | 40            |
| G9         | 302           | 419           | 434           | 113           | 122           | 108           | 124           | 70            | 73            | 57            | 60            | 21            | 44            | 29            |
| G10        | 4188          | 4909          | 4524          | 686           | 477           | 505           | 540           | 379           | 284           | 148           | 178           | 125           | 151           | 84            |
| G11        | 104           | 97            | 115           | 219           | 108           | 72            | 102           | 133           | 74            | 105           | 57            | 72            | 85            | 46            |
| G12        | 1260          | 1118          | 1296          | 155           | 138           | 117           | 134           | 79            | 76            | 30            | 39            | 21            | 20            | 29            |
| G13        | 682           | 881           | 920           | 4627          | 3705          | 2371          | 2745          | 2482          | 1619          | 2363          | 1831          | 1806          | 2120          | 1869          |
| G14        | 1505          | 1704          | 2022          | 139           | 321           | 238           | 405           | 295           | 157           | 92            | 157           | 59            | 91            | 87            |
| G15        | 2072          | 3605          | 2503          | 3500          | 3021          | 1775          | 2331          | 2219          | 1185          | 2205          | 1646          | 1673          | 1963          | 1434          |
| G16        | 18763         | 18787         | 19872         | 3480          | 1678          | 802           | 691           | 200           | 366           | 33            | 71            | 13            | 27            | 36            |
| G17        | 25345         | 15221         | 20179         | 2099          | 648           | 282           | 249           | 111           | 147           | 16            | 42            | 25            | 16            | 42            |
| G18        | 279           | 140           | 164           | 7987          | 9074          | 4044          | 5544          | 5542          | 3029          | 2125          | 1813          | 1947          | 2225          | 1245          |
| G19        | 11817         | 12903         | 13548         | 894           | 604           | 238           | 460           | 461           | 125           | 179           | 174           | 226           | 201           | 81            |
| G20        | 27985         | 30603         | 29943         | 1331          | 996           | 542           | 733           | 627           | 282           | 333           | 359           | 414           | 445           | 198           |
| G21        | 92762         | 91837         | 86112         | 1671          | 952           | 573           | 714           | 533           | 290           | 168           | 238           | 217           | 223           | 142           |
| G22        | 244           | 100           | 195           | 13739         | 26378         | 27281         | 29603         | 52602         | 31496         | 28319         | 35520         | 26190         | 31323         | 41092         |
| G23        | 97            | 78            | 126           | 126           | 280           | 650           | 292           | 939           | 796           | 1931          | 3284          | 721           | 1508          | 4759          |
| G24        | 731           | 249           | 368           | 24506         | 20506         | 15387         | 18146         | 13315         | 11527         | 12085         | 10594         | 14410         | 13765         | 9308          |
| G25        | 349           | 70            | 156           | 16916         | 23211         | 36336         | 26399         | 13788         | 36942         | 49179         | 44883         | 35329         | 41007         | 45685         |
| G26        | 108           | 68            | 86            | 9707          | 9640          | 11232         | 8378          | 6595          | 10517         | 11409         | 11934         | 8110          | 8647          | 13982         |
| G27        | 750           | 148           | 242           | 28692         | 55326         | 69661         | 80542         | 80218         | 82934         | 73914         | 65753         | 96435         | 82741         | 62953         |
| G28        | 268           | 252           | 297           | 152           | 201           | 361           | 192           | 272           | 660           | 750           | 1224          | 801           | 924           | 1429          |
| G29        | 286           | 88            | 144           | 6754          | 6520          | 10603         | 8443          | 9403          | 9119          | 8919          | 8372          | 10566         | 9340          | 6640          |
| G30        | 151           | 200           | 241           | 56            | 79            | 221           | 42            | 64            | 291           | 326           | 752           | 298           | 390           | 1221          |
| G31        | 7302          | 8812          | 8314          | 3655          | 2646          | 1795          | 2233          | 1992          | 1002          | 1103          | 1036          | 1185          | 1235          | 850           |
| G32        | 299           | 197           | 252           | 8301          | 7304          | 6267          | 6287          | 6015          | 5823          | 5504          | 5934          | 5057          | 5536          | 6712          |
| G33        | 91            | 53            | 66            | 271           | 443           | 404           | 501           | 638           | 463           | 826           | 600           | 918           | 920           | 332           |
| G34        | 698           | 591           | 569           | 11743         | 5161          | 4109          | 3255          | 2971          | 3015          | 1526          | 2126          | 1585          | 1722          | 1574          |
| <b>Sum</b> | <b>203310</b> | <b>198059</b> | <b>197069</b> | <b>207783</b> | <b>222629</b> | <b>222670</b> | <b>228681</b> | <b>232366</b> | <b>221508</b> | <b>222817</b> | <b>217099</b> | <b>227471</b> | <b>229227</b> | <b>219261</b> |

**Table S2.8: Absolute cell numbers in gates from G1 to G34 of samples picked between 333 and 341 h**

| Time       | 333 h         | 335 h         | 335.5 h       | 336 h         | 336.5 h       | 337 h         | 337.5 h       | 338 h         | 338.5 h       | 339 h         | 339.5 h       | 340 h         | 340.5 h       | 341 h         |
|------------|---------------|---------------|---------------|---------------|---------------|---------------|---------------|---------------|---------------|---------------|---------------|---------------|---------------|---------------|
| G1         | 3512          | 2235          | 2331          | 2630          | 2317          | 3046          | 3339          | 3698          | 3814          | 2751          | 2508          | 3413          | 3822          | 4363          |
| G2         | 3526          | 2020          | 2065          | 2200          | 2062          | 2334          | 2845          | 2707          | 2541          | 2113          | 2219          | 2636          | 3092          | 2980          |
| G3         | 5625          | 4440          | 4164          | 3877          | 4161          | 4075          | 4275          | 2768          | 2311          | 3025          | 3301          | 3294          | 4640          | 3189          |
| G4         | 364           | 506           | 425           | 603           | 639           | 570           | 816           | 621           | 572           | 760           | 642           | 758           | 790           | 655           |
| G5         | 13525         | 9184          | 11462         | 14431         | 11853         | 14611         | 12364         | 16891         | 20106         | 13170         | 13465         | 12426         | 13567         | 19403         |
| G6         | 6068          | 4416          | 4659          | 7025          | 6698          | 10182         | 14666         | 11868         | 11180         | 11653         | 10026         | 12447         | 12717         | 12847         |
| G7         | 10156         | 7657          | 7625          | 9729          | 9698          | 10644         | 12212         | 11119         | 9533          | 9490          | 8162          | 10097         | 12288         | 10852         |
| G8         | 23            | 2             | 14            | 0             | 15            | 45            | 2             | 4             | 0             | 3             | 1             | 0             | 3             | 0             |
| G9         | 14            | 3             | 7             | 7             | 14            | 54            | 5             | 10            | 2             | 12            | 2             | 5             | 4             | 2             |
| G10        | 27            | 35            | 25            | 35            | 40            | 94            | 19            | 25            | 9             | 18            | 15            | 6             | 36            | 6             |
| G11        | 28            | 41            | 40            | 76            | 49            | 38            | 43            | 40            | 39            | 33            | 31            | 26            | 50            | 34            |
| G12        | 15            | 12            | 21            | 24            | 25            | 16            | 17            | 40            | 56            | 27            | 23            | 29            | 25            | 49            |
| G13        | 2447          | 1692          | 1801          | 1701          | 1640          | 1831          | 1853          | 1018          | 692           | 1026          | 1125          | 1228          | 2217          | 1324          |
| G14        | 16            | 17            | 27            | 21            | 29            | 45            | 14            | 15            | 9             | 12            | 10            | 13            | 22            | 21            |
| G15        | 1247          | 862           | 1060          | 1023          | 916           | 1177          | 1046          | 445           | 239           | 403           | 436           | 526           | 1302          | 705           |
| G16        | 0             | 0             | 4             | 9             | 4             | 17            | 2             | 3             | 1             | 5             | 2             | 2             | 9             | 2             |
| G17        | 5             | 3             | 5             | 2             | 5             | 19            | 4             | 9             | 4             | 5             | 5             | 4             | 8             | 7             |
| G18        | 1146          | 937           | 874           | 1078          | 1150          | 1594          | 2111          | 1257          | 1173          | 1377          | 1117          | 1792          | 2125          | 1573          |
| G19        | 171           | 67            | 100           | 104           | 88            | 177           | 229           | 109           | 62            | 73            | 85            | 130           | 296           | 189           |
| G20        | 470           | 194           | 250           | 318           | 219           | 346           | 478           | 264           | 143           | 203           | 201           | 283           | 648           | 449           |
| G21        | 421           | 179           | 221           | 289           | 199           | 347           | 490           | 415           | 433           | 300           | 313           | 401           | 595           | 691           |
| G22        | 38576         | 42591         | 42513         | 49195         | 41430         | 41103         | 40912         | 40494         | 41317         | 42150         | 41930         | 43914         | 38821         | 47052         |
| G23        | 22790         | 25868         | 26542         | 29451         | 25859         | 24446         | 25217         | 22460         | 24878         | 25736         | 26113         | 27367         | 25718         | 32777         |
| G24        | 11621         | 11009         | 10067         | 9680          | 11001         | 9661          | 11840         | 11849         | 11357         | 13553         | 12805         | 13778         | 13207         | 10182         |
| G25        | 30561         | 36844         | 35154         | 24496         | 33335         | 30878         | 28978         | 18822         | 13014         | 35628         | 38620         | 32880         | 26934         | 9304          |
| G26        | 7001          | 9518          | 8970          | 6044          | 8087          | 7966          | 6711          | 6463          | 6002          | 8493          | 9652          | 8078          | 7116          | 5407          |
| G27        | 39712         | 36489         | 37543         | 39629         | 36472         | 42100         | 39439         | 43347         | 42357         | 35002         | 34210         | 36454         | 36175         | 36043         |
| G28        | 5056          | 4766          | 5821          | 6431          | 6070          | 2283          | 2400          | 7204          | 8686          | 6497          | 6074          | 3406          | 3011          | 3965          |
| G29        | 7373          | 7541          | 6923          | 6306          | 8062          | 6047          | 7115          | 7215          | 6335          | 7716          | 7124          | 6578          | 6039          | 5158          |
| G30        | 5762          | 5190          | 5808          | 5689          | 5026          | 2576          | 2479          | 4511          | 7725          | 3702          | 4270          | 2702          | 2400          | 6880          |
| G31        | 3020          | 1520          | 1703          | 2046          | 1600          | 2072          | 2751          | 2076          | 1811          | 1671          | 1825          | 2214          | 3095          | 2798          |
| G32        | 8738          | 8344          | 7086          | 5994          | 7608          | 6284          | 7123          | 5807          | 5107          | 6375          | 6916          | 6578          | 6913          | 5137          |
| G33        | 1347          | 1211          | 1245          | 1944          | 1600          | 2435          | 2399          | 2518          | 1914          | 2311          | 2188          | 2328          | 2491          | 2016          |
| G34        | 3056          | 2376          | 2327          | 2776          | 2610          | 3109          | 3129          | 3423          | 3438          | 2675          | 2271          | 3370          | 3595          | 3980          |
| <b>Sum</b> | <b>233419</b> | <b>227769</b> | <b>228882</b> | <b>234863</b> | <b>230581</b> | <b>232222</b> | <b>237323</b> | <b>229515</b> | <b>226860</b> | <b>237968</b> | <b>237687</b> | <b>239163</b> | <b>233771</b> | <b>230040</b> |

**Table S2.9: Absolute cell numbers in gates from G1 to G34 of samples picked between 355 and 408 h**

| Time       | 355 h         | 357 h         | 359 h         | 361 h         | 363 h         | 365 h         | 367 h         | 403 h         | 405 h         | 405.5 h       | 406 h         | 406.5 h       | 407.5 h       | 408 h         |
|------------|---------------|---------------|---------------|---------------|---------------|---------------|---------------|---------------|---------------|---------------|---------------|---------------|---------------|---------------|
| G1         | 4379          | 3034          | 3224          | 3143          | 4079          | 4004          | 4140          | 4309          | 4054          | 4704          | 4492          | 4131          | 5120          | 4559          |
| G2         | 3496          | 2412          | 2438          | 2281          | 2455          | 2665          | 2686          | 2818          | 2350          | 2845          | 3047          | 2603          | 3619          | 2633          |
| G3         | 2929          | 2643          | 2616          | 2350          | 1599          | 2107          | 1761          | 1413          | 921           | 1633          | 1517          | 1320          | 1945          | 769           |
| G4         | 814           | 626           | 585           | 603           | 615           | 850           | 538           | 299           | 322           | 1071          | 535           | 654           | 956           | 668           |
| G5         | 8629          | 12499         | 10668         | 10273         | 15490         | 12196         | 9130          | 6173          | 5033          | 7613          | 5717          | 5325          | 3582          | 6284          |
| G6         | 7743          | 5373          | 6092          | 8659          | 5876          | 7449          | 6089          | 4521          | 3414          | 8345          | 4924          | 5307          | 5172          | 4538          |
| G7         | 11168         | 6255          | 7686          | 8198          | 7816          | 8397          | 7977          | 8788          | 6696          | 8892          | 7548          | 7237          | 7997          | 8225          |
| G8         | 7             | 12            | 5             | 4             | 1             | 15            | 3             | 0             | 1             | 4             | 2             | 8             | 3             | 1             |
| G9         | 7             | 13            | 3             | 6             | 4             | 12            | 5             | 3             | 4             | 5             | 4             | 17            | 1             | 1             |
| G10        | 50            | 57            | 24            | 34            | 17            | 45            | 13            | 13            | 12            | 22            | 8             | 38            | 6             | 12            |
| G11        | 31            | 33            | 26            | 19            | 34            | 35            | 23            | 31            | 25            | 54            | 36            | 40            | 32            | 28            |
| G12        | 34            | 41            | 23            | 25            | 45            | 55            | 29            | 25            | 15            | 52            | 27            | 30            | 21            | 42            |
| G13        | 1148          | 773           | 830           | 828           | 482           | 659           | 581           | 434           | 251           | 566           | 517           | 409           | 645           | 221           |
| G14        | 28            | 29            | 18            | 18            | 12            | 26            | 8             | 9             | 8             | 21            | 22            | 60            | 13            | 6             |
| G15        | 594           | 255           | 274           | 335           | 126           | 246           | 223           | 166           | 84            | 287           | 195           | 140           | 283           | 88            |
| G16        | 7             | 14            | 3             | 4             | 3             | 6             | 5             | 5             | 1             | 4             | 0             | 5             | 3             | 3             |
| G17        | 7             | 11            | 9             | 8             | 5             | 17            | 1             | 4             | 8             | 35            | 10            | 24            | 5             | 15            |
| G18        | 1747          | 1052          | 1207          | 1139          | 1162          | 1462          | 1094          | 1327          | 996           | 2076          | 1520          | 1348          | 1207          | 1249          |
| G19        | 223           | 98            | 96            | 107           | 69            | 109           | 63            | 54            | 24            | 146           | 111           | 69            | 178           | 55            |
| G20        | 469           | 183           | 191           | 225           | 148           | 212           | 156           | 182           | 76            | 367           | 297           | 179           | 370           | 179           |
| G21        | 729           | 345           | 345           | 294           | 406           | 501           | 369           | 522           | 412           | 846           | 725           | 582           | 992           | 806           |
| G22        | 47101         | 44953         | 43721         | 48953         | 47430         | 47304         | 54304         | 65801         | 56317         | 59129         | 59995         | 61121         | 56188         | 61607         |
| G23        | 50668         | 54401         | 54804         | 57297         | 61928         | 61084         | 71244         | 65807         | 93597         | 58882         | 70932         | 70045         | 75544         | 80645         |
| G24        | 11226         | 8778          | 9870          | 8830          | 7362          | 8366          | 7900          | 7370          | 5633          | 7408          | 7375          | 7344          | 8232          | 5714          |
| G25        | 20310         | 22468         | 26220         | 21086         | 10209         | 18873         | 15078         | 10476         | 10825         | 11760         | 10992         | 11410         | 8206          | 10608         |
| G26        | 3870          | 6984          | 6824          | 5448          | 4054          | 4384          | 3913          | 2482          | 2382          | 2571          | 2516          | 2624          | 1922          | 2169          |
| G27        | 33238         | 27956         | 31326         | 31345         | 27658         | 25765         | 27082         | 25883         | 18601         | 25960         | 26187         | 26912         | 27365         | 23458         |
| G28        | 1593          | 6309          | 4104          | 5577          | 6027          | 5998          | 3529          | 3302          | 2780          | 3813          | 1963          | 1888          | 1139          | 2087          |
| G29        | 7603          | 5592          | 6458          | 6493          | 5087          | 6376          | 6060          | 8002          | 6115          | 8520          | 8199          | 8269          | 7703          | 7370          |
| G30        | 2376          | 8222          | 4270          | 4005          | 10320         | 6634          | 3988          | 3366          | 3372          | 4598          | 3023          | 3574          | 1798          | 3190          |
| G31        | 3292          | 1908          | 1730          | 1646          | 1680          | 2070          | 1910          | 1910          | 1582          | 2311          | 2463          | 1899          | 3286          | 2034          |
| G32        | 5253          | 5696          | 5887          | 4909          | 3669          | 4535          | 4125          | 3147          | 2305          | 3550          | 3337          | 3151          | 3655          | 2087          |
| G33        | 1995          | 2003          | 2037          | 2034          | 2093          | 2320          | 1965          | 340           | 482           | 753           | 691           | 665           | 860           | 1569          |
| G34        | 3647          | 2603          | 3034          | 2922          | 3355          | 3476          | 3352          | 3971          | 3259          | 4603          | 4027          | 3709          | 4264          | 4014          |
| <b>Sum</b> | <b>236411</b> | <b>233631</b> | <b>236648</b> | <b>239098</b> | <b>231316</b> | <b>238253</b> | <b>239344</b> | <b>232953</b> | <b>231957</b> | <b>233446</b> | <b>232954</b> | <b>232137</b> | <b>232312</b> | <b>236934</b> |

**Table S2.10: Absolute cell numbers in gates from G1 to G34 of samples picked between 408.5 and 435 h**

| Time       | 408.5 h       | 409 h         | 409.5 h       | 410 h         | 410.5 h       | 411 h         | 411.5 h       | 412 h         | 412.5 h       | 427 h         | 429 h         | 431 h         | 433 h         | 435 h         |
|------------|---------------|---------------|---------------|---------------|---------------|---------------|---------------|---------------|---------------|---------------|---------------|---------------|---------------|---------------|
| G1         | 3788          | 4743          | 4626          | 4865          | 2575          | 2432          | 3516          | 3524          | 2471          | 2755          | 3486          | 3019          | 4425          | 3089          |
| G2         | 2182          | 3227          | 2634          | 2738          | 1228          | 1262          | 1488          | 1614          | 1257          | 1513          | 1881          | 1448          | 2410          | 1502          |
| G3         | 1484          | 1349          | 1003          | 1399          | 1093          | 1203          | 870           | 1048          | 1091          | 1401          | 806           | 846           | 1705          | 861           |
| G4         | 1473          | 1197          | 1200          | 3359          | 621           | 446           | 426           | 298           | 258           | 373           | 242           | 201           | 402           | 354           |
| G5         | 5841          | 5531          | 6271          | 6117          | 7408          | 14382         | 11639         | 9373          | 9728          | 6614          | 8444          | 9728          | 6960          | 7378          |
| G6         | 7192          | 5909          | 6054          | 7606          | 4181          | 6309          | 7989          | 5983          | 4734          | 5644          | 3264          | 4654          | 5349          | 4621          |
| G7         | 7994          | 7740          | 8157          | 8749          | 6649          | 6789          | 9420          | 9275          | 6878          | 9593          | 6656          | 7954          | 11568         | 9886          |
| G8         | 0             | 2             | 0             | 0             | 4             | 2             | 1             | 4             | 0             | 0             | 0             | 2             | 6             | 1             |
| G9         | 2             | 5             | 6             | 2             | 5             | 1             | 3             | 3             | 1             | 1             | 2             | 1             | 0             | 8             |
| G10        | 4             | 13            | 13            | 8             | 29            | 3             | 32            | 36            | 4             | 2             | 0             | 5             | 60            | 8             |
| G11        | 24            | 34            | 29            | 28            | 16            | 17            | 18            | 9             | 7             | 7             | 10            | 2             | 12            | 9             |
| G12        | 76            | 27            | 54            | 78            | 41            | 37            | 69            | 28            | 23            | 9             | 17            | 14            | 28            | 23            |
| G13        | 571           | 440           | 291           | 494           | 338           | 382           | 293           | 437           | 379           | 554           | 217           | 280           | 648           | 319           |
| G14        | 16            | 14            | 20            | 15            | 8             | 29            | 5             | 4             | 8             | 25            | 4             | 7             | 19            | 14            |
| G15        | 298           | 162           | 111           | 185           | 127           | 152           | 124           | 211           | 172           | 312           | 61            | 126           | 246           | 169           |
| G16        | 8             | 7             | 2             | 1             | 14            | 15            | 40            | 1             | 12            | 4             | 8             | 3             | 1             | 2             |
| G17        | 44            | 21            | 20            | 23            | 17            | 12            | 24            | 5             | 15            | 3             | 4             | 2             | 3             | 4             |
| G18        | 1566          | 1483          | 1433          | 2556          | 874           | 1087          | 1513          | 1062          | 766           | 1182          | 711           | 694           | 1312          | 969           |
| G19        | 254           | 84            | 68            | 77            | 19            | 25            | 42            | 67            | 32            | 66            | 29            | 29            | 68            | 32            |
| G20        | 521           | 240           | 179           | 208           | 57            | 74            | 143           | 154           | 57            | 141           | 54            | 95            | 158           | 113           |
| G21        | 1135          | 775           | 790           | 836           | 260           | 262           | 363           | 316           | 201           | 155           | 207           | 197           | 467           | 242           |
| G22        | 50276         | 69117         | 71333         | 63780         | 62063         | 42686         | 56834         | 64695         | 64373         | 82636         | 85862         | 75276         | 79441         | 83315         |
| G23        | 89587         | 54990         | 69907         | 63070         | 66277         | 56141         | 67192         | 77556         | 70510         | 44474         | 56984         | 66381         | 59311         | 62795         |
| G24        | 5629          | 6809          | 5101          | 5861          | 5855          | 5798          | 4805          | 4993          | 4917          | 8583          | 5075          | 5089          | 7196          | 5769          |
| G25        | 11333         | 12473         | 10072         | 12683         | 9472          | 6328          | 4281          | 5628          | 6409          | 11664         | 9192          | 6654          | 6599          | 7401          |
| G26        | 2913          | 3083          | 2536          | 3349          | 2633          | 2406          | 1533          | 1813          | 1847          | 4042          | 1970          | 1898          | 1994          | 2034          |
| G27        | 21934         | 29864         | 26017         | 25155         | 20921         | 17925         | 19836         | 21985         | 19304         | 27659         | 19256         | 20514         | 19819         | 22526         |
| G28        | 2413          | 2868          | 3159          | 4412          | 11170         | 11623         | 10057         | 5575          | 10327         | 4036          | 7372          | 3724          | 3433          | 3549          |
| G29        | 5681          | 9215          | 5462          | 5280          | 5025          | 4381          | 3562          | 3502          | 3929          | 8821          | 4986          | 4364          | 5854          | 5476          |
| G30        | 3048          | 3498          | 3596          | 3618          | 7885          | 29861         | 14129         | 7713          | 11898         | 2524          | 5986          | 9967          | 3310          | 3890          |
| G31        | 2124          | 2662          | 2097          | 2422          | 672           | 832           | 1057          | 1199          | 716           | 1038          | 1015          | 940           | 1802          | 1056          |
| G32        | 2928          | 3141          | 2177          | 3149          | 2690          | 2877          | 2026          | 2034          | 2219          | 3575          | 2063          | 1874          | 3338          | 2142          |
| G33        | 1805          | 1026          | 1425          | 3677          | 1139          | 1146          | 1239          | 1030          | 970           | 1635          | 1351          | 1297          | 2636          | 1901          |
| G34        | 3646          | 4035          | 3725          | 4124          | 2720          | 2916          | 3946          | 3921          | 2872          | 3500          | 2854          | 3238          | 4792          | 3788          |
| <b>Sum</b> | <b>237790</b> | <b>235784</b> | <b>239568</b> | <b>239924</b> | <b>224086</b> | <b>219841</b> | <b>228515</b> | <b>235096</b> | <b>228385</b> | <b>234541</b> | <b>230069</b> | <b>230523</b> | <b>235372</b> | <b>235246</b> |

## S2.6: Movie snapshots on AMC and CMC dynamics in the continuous reactor

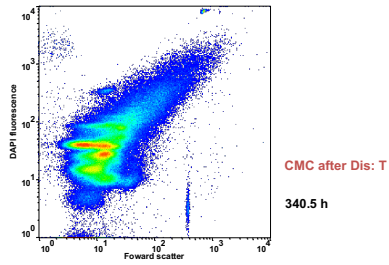

**Figure S2.4:** Microbial community described by its single-cell characteristics (FSC and DAPI fluorescence) in time series. Long-term and short-term pulse disturbances are marked on the right side of the 2D-dot plots. The full movie is provided as a QuickTime movie file (Movie S1.mov).

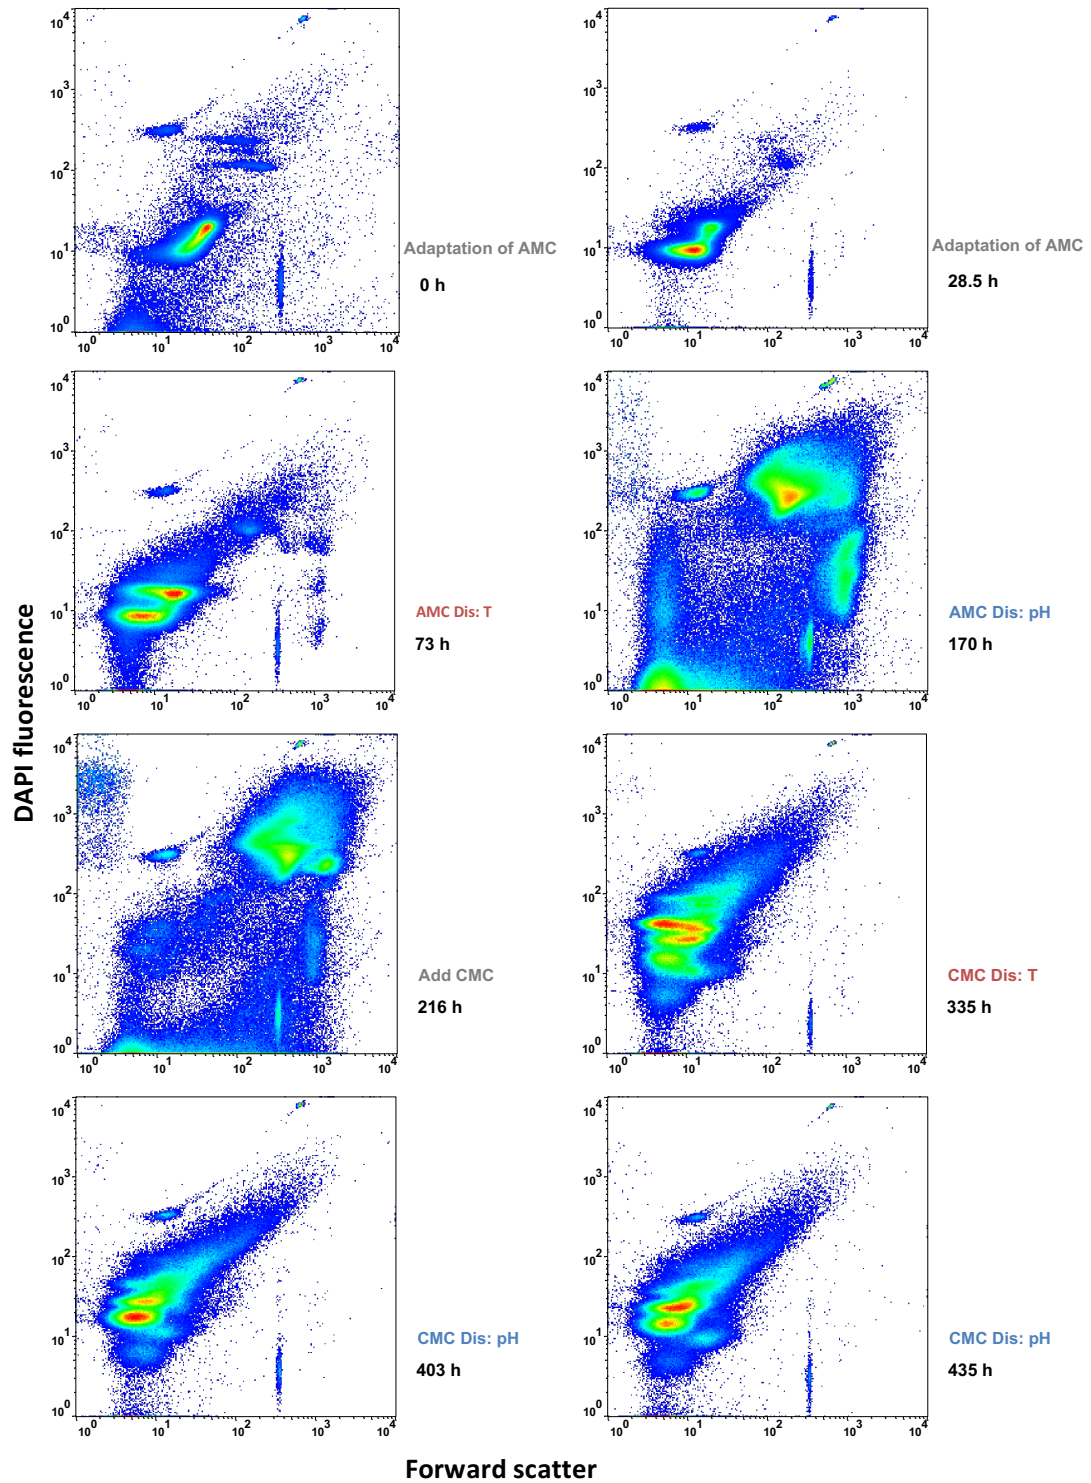

**Figure S2.5:** Exemplary 2D-dot plots (FSC and DAPI fluorescence) are shown. The samples were chosen according to the different disturbances addressed to the AMC and CMC in the continuous reactor.

## S2.7: Variation in cytometric structures analysed by the flowCyBar

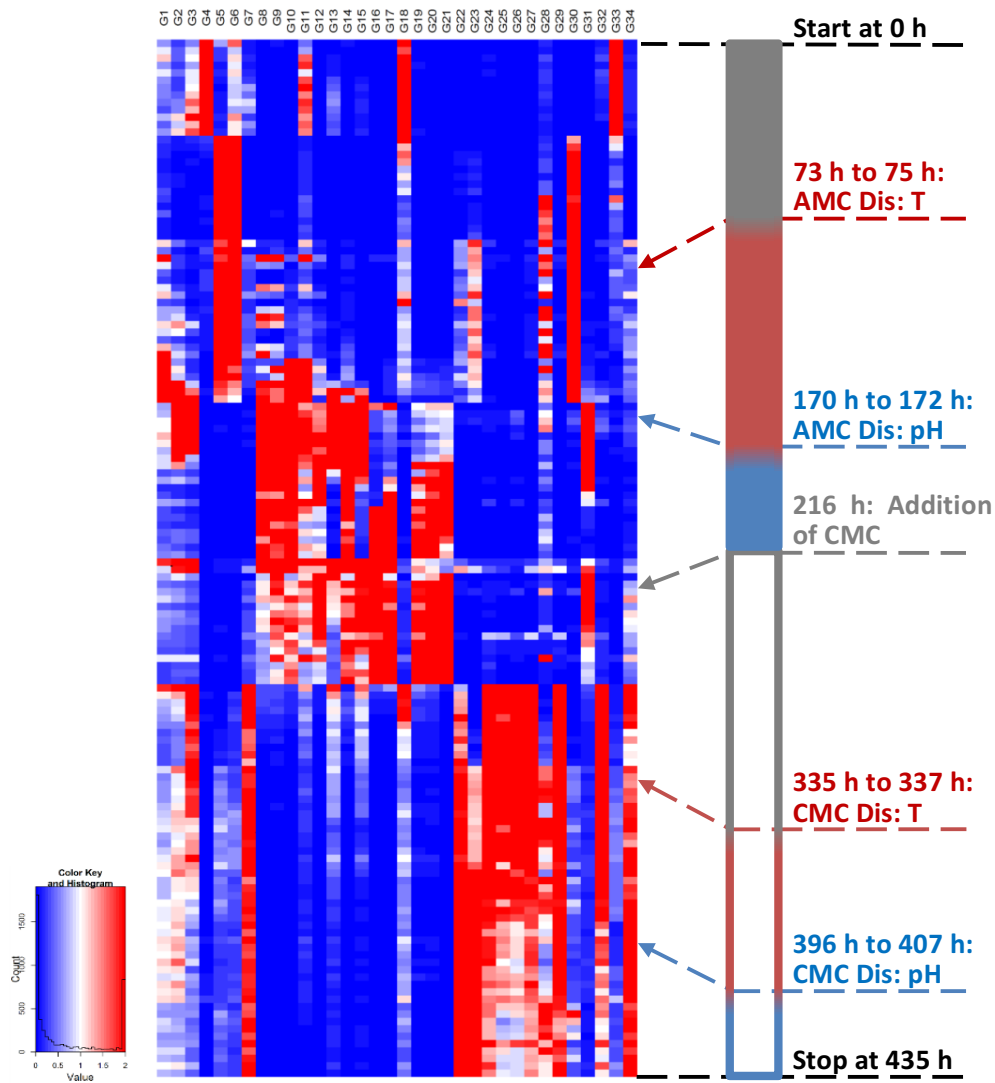

**Figure S2.6:** Changes in the cytometric community structure were visualized by using the FlowCybar tool (<https://bioconductor.org/packages/release/bioc/html/flowCyBar.html>). The relative cell abundance per gate (34 gates) is shown for each sampling point (140) during 435 h of cultivation (abundances given in Section S2.5). The scale of abundance is indicated by a color gradient, from the dark blue corresponding to low virtual cell abundance to red for high virtual cell abundance per gate (see colour key). The white color indicates the average of virtual cells per gate. Start of the various disturbances are marked by arrows (red for temperature disturbance, blue for pH disturbance and grey for the inoculation of the CMC) while the time periods after disturbances are outlined by a colour bar (right side) that corresponds to Figure 1.

It is obvious that the AMC showed low numbers of occupied gates with only a few gates above average comprising 4.38 % to 48.84 % of all cells at 0 h. The simple structure of the AMC varied during continuous cultivation due to alterations in the strains' dominances (up to 216 h). A complete structure shift, induced by CMC, was finally seen after 236 h. The addition of the CMC to the reactor (at 216 h), increased the cell number by at least one order of magnitude within the following 23 h (Fig. S1.1 in Text S1 in the supplemental material). As could be expected, the AMC was eventually overgrown by the CMC and vanished completely thus representing zero resilience. Also the sequencing data did not show any OTUs from the AMC despite a 1 % appearance in the G5 of the 412 h sample (*Comamonadaceae*, Fig. S5.6 in Text S5 in the supplemental material). Instead the CMC mock community (used as a positive control in the sequencing analysis) represented eight other OTUs and even most of the sorted gates did not contain any of the AMC members (Text S5 in the supplemental material, Section S5.4).

## References

Koch, C., Harnisch, F., Schröder, U. & Müller, S. (2014) Cytometric fingerprints: evaluation of new tools for analyzing microbial community dynamics. *Frontiers in Microbiology*, 5, 273.
